# Supplementary material
Source: PubMed Central journal article supplement (PMC11105384)
Supplement: 18_2018_2768_MOESM4_ESM.pdf [file 18_2018_2768_MOESM4_ESM.pdf]

Supplementary Table S1: Abundant venom proteins detected by LC-MS/MS.

| Venom protein             | Proportion of precursor counts (sample, lane) | Predicted MW (kDa) | Observed MW (kDa) |
|---------------------------|-----------------------------------------------|--------------------|-------------------|
| Family 1, protein 1       | 74% (3, CV), 70% (18, PMG4), 30% (33, AMG)    | 15.1               | 15                |
| Nuclease 1                | 40% (10, CV)                                  | 43.5               | 48                |
| 5' nucleotidase 1         | 37% (11, CV)                                  | 58.8               | 65                |
| Family 12, protein 1      | 82% (30, AMG); 87% (20, SS); 73% (14, AG)     | 18.7–19.1          | 18                |
| Family 27, protein 1      | 97% (31, AMG)                                 | 20.8               | 20                |
| Hemolysin-like proteins 1 | 86% (32, AMG)                                 | 21.1               | 22                |
| Hemolysin-like proteins 2 | 52% (34, AMG)                                 | 23.3               | 25                |
| S1 protease 1             | 97% (29, SS)                                  | 32.0               | 30                |
| S1 proteases (various)    | ND                                            | 25–35              | 25–35             |
| Family 2, protein 4       | 34% (22, PMG2)                                | 25.3               | 23                |
| Odorant binding protein 1 | 52% (19, PMG4)                                | 14.1               | 16                |
| Pacifastin, 1 & 2         | 76% (37, PMG2); 62% (44, AG)                  | ND                 | <10               |
| Family 33, protein 1      | 59% (15, AG)                                  | 30.6               | 28                |

CV, clear venom; AMG, anterior main gland; PMG, posterior main gland; SS, storage sacks; AG, accessory gland; ND, not determined
